# Supplementary material
Source: MDPI journal article supplement (https://www.mdpi.com/2073-8994/14/1/42)
Supplement: s1 [file s1]

**Table S1.** Comparison of the different models for the analysis of the relationships between frustule size and shape asymmetry of *E. bilunaris*.

| Function    | Formula<br>(general) | Formula<br>(specific)              | AIC     |
|-------------|----------------------|------------------------------------|---------|
| linear      | $y = ax + b$         | $y = 26267x + 3069.7$              | 1.69e07 |
| quadratic   | $y = ax^2 + bx + c$  | $y = 5.14e05x^2 - 68901x + 3684.7$ | 1.33e07 |
| power law   | $y = ax^b + c$       | $y = 538.8x^{-0.382}$              | 1.29e07 |
| exponential | $y = ae^{bx} + c$    | $y = 3467.3e^{-15.5x}$             | 1.47e07 |
